# Supplementary material for: Development and Optimization of Cinnamon Oil Nanoemulgel for Enhancement of Solubility and Evaluation of Antibacterial, Antifungal and Analgesic Effects against Oral Microbiota
Source: MDPI journal article supplement (doi:10.3390/pharmaceutics13071008), 2021-07-02
Supplement: s1 [file s1]

# Supplementary Materials: Development and Optimization of Cinnamon Oil Nanoemulgel for Enhancement of Solubility and Evaluation of Antibacterial, Antifungal and Analgesic Effects against Oral Microbiota

Khaled M. Hosny, Rasha A. Khallaf, Hani Z. Asfour, Waleed Y. Rizg, Nabil A. Alhakamy, Amal M. Sindi, Hala M. Alkhalidi, Walaa A. Abualsunun, Rana B. Bakhaidar, Alshaimaa M. Almehmady, Wesam H. Abdulaal, Mohammed A. Bakhrebah, Mohammed S. Alsuaibeyl, Ahmed K. Kammoun, Adel F. Alghaith and Sultan Alshehri

**Table S1.** ANOVA data for globule size of CO-NE formulations in various runs.

| Source                     | p-value  | Significance |
|----------------------------|----------|--------------|
| <b>Model</b>               | < 0.0001 | significant  |
| A-Cinnamon Oil percent     | 0.0006   | --           |
| B-S <sub>mix</sub> percent | < 0.0001 | significant  |
| C-HLB                      | < 0.0001 | significant  |
| AB                         | 0.1566   | --           |
| AC                         | 0.3663   | --           |
| BC                         | < 0.0001 | significant  |
| <b>Residual</b>            | --       | --           |
| Lack of Fit                | 0.0173   | significant  |

**Table S2.** ANOVA data for the stability index of the CO-NE formulations in various runs.

| Source                     | p-value  | --              |
|----------------------------|----------|-----------------|
| <b>Model</b>               | < 0.0001 | significant     |
| A-Cinnamon Oil percent     | 0.3510   | --              |
| B-S <sub>mix</sub> percent | < 0.0001 | significant     |
| C-HLB                      | < 0.0001 | significant     |
| <b>Residual</b>            | --       | --              |
| Lack of Fit                | 0.0517   | not significant |

**Table S3.** ANOVA data for the stability index of the CO-NE formulations in various runs.

| Source                     | p-value  | --          |
|----------------------------|----------|-------------|
| <b>Model</b>               | < 0.0001 | significant |
| A-Cinnamon Oil percent     | < 0.0001 | significant |
| B-S <sub>mix</sub> percent | 0.0513   | --          |
| C-HLB                      | 0.0002   | --          |
| AB                         | 0.4013   | --          |
| AC                         | 0.1090   | --          |
| BC                         | 0.2107   | --          |
| A <sup>2</sup>             | 0.0005   | --          |
| B <sup>2</sup>             | 0.0063   | --          |
| C <sup>2</sup>             | 0.8512   | --          |
| <b>Residual</b>            | --       | --          |
| Lack of Fit                | --       | --          |

**Table S4.** Coefficient Table indicated p-values for each of selected factor on each re.

|                           | Intercept | A        | B        | C        | AB       | AC       | BC        | A <sup>2</sup> | B <sup>2</sup> | C <sup>2</sup> |
|---------------------------|-----------|----------|----------|----------|----------|----------|-----------|----------------|----------------|----------------|
| <b>Globule Size</b>       | 129.363   | −3.78168 | −12.8252 | −32.6735 | 1.62239  | 1.0667   | 7.90462   |                |                |                |
| <b>p-values</b>           |           | 0.0006   | < 0.0001 | < 0.0001 | 0.1566   | 0.3663   | < 0.0001  |                |                |                |
| <b>Stability Index</b>    | 80.3597   | 0.455694 | 3.48621  | 10.3469  |          |          |           |                |                |                |
| <b>p-values</b>           |           | 0.3510   | < 0.0001 | < 0.0001 |          |          |           |                |                |                |
| <b>Zone of Inhibition</b> | 14.4553   | 6.16188  | 0.487956 | 1.19226  | 0.260898 | 0.554172 | −0.383875 | 1.81754        | −1.22267       | −0.0738419     |
| <b>p-values</b>           |           | < 0.0001 | 0.0513   | 0.0002   | 0.4013   | 0.1090   | 0.2107    | 0.0005         | 0.0063         | 0.8512         |
